# Supplementary material
Source: publisher figshare collection journal article supplement (https://acs.figshare.com/ndownloader/files/7534531)
Supplement: Supplementary file 1 [file 7534531]

*Supporting Information for*

# Structure Manipulation in Triptycene-Based Polyimides through Main Chain Geometry Variation and its Effect on Gas Transport Properties

Jennifer R. Weidman, Shuangjiang Luo, Qinnan Zhang, Ruilan Guo\*

*University of Notre Dame, Department of Chemical and Biomolecular Engineering, Notre  
Dame, IN 46556*

\* Corresponding author, +1-574-631-3453 (tel), +1-574-631-0317 (fax),

[rguo@nd.edu](mailto:rguo@nd.edu)

### Synthesis Details:

**1,4-bis(nitrophenoxy)tritycene (1):** 1,4-dihydroxytritycene was synthesized as reported in our previous paper. [1] To make the 1,4-bis(nitrophenoxy)tritycene, the following were combined in a 100 mL 2-neck flask equipped with a magnetic stir bar: 1,4-dihydroxytritycene (2.0 g, 0.007 mol), potassium carbonate (2.12 g, 0.015 mol), and dimethylformamide (DMF) (20 mL). The mixture was allowed to stir at room temperature for 40 min and then 1-fluoro-2-nitrobenzene (1.97 g, 0.014 mol) was added. The reaction mixture was put on to reflux under nitrogen protection at 151 °C for 8 h. After cooling, the mixture was precipitated in a mixture of methanol and water (1:1 v/v, 120 mL), collected, and dried under vacuum at 100 °C overnight. (yield = 90%).

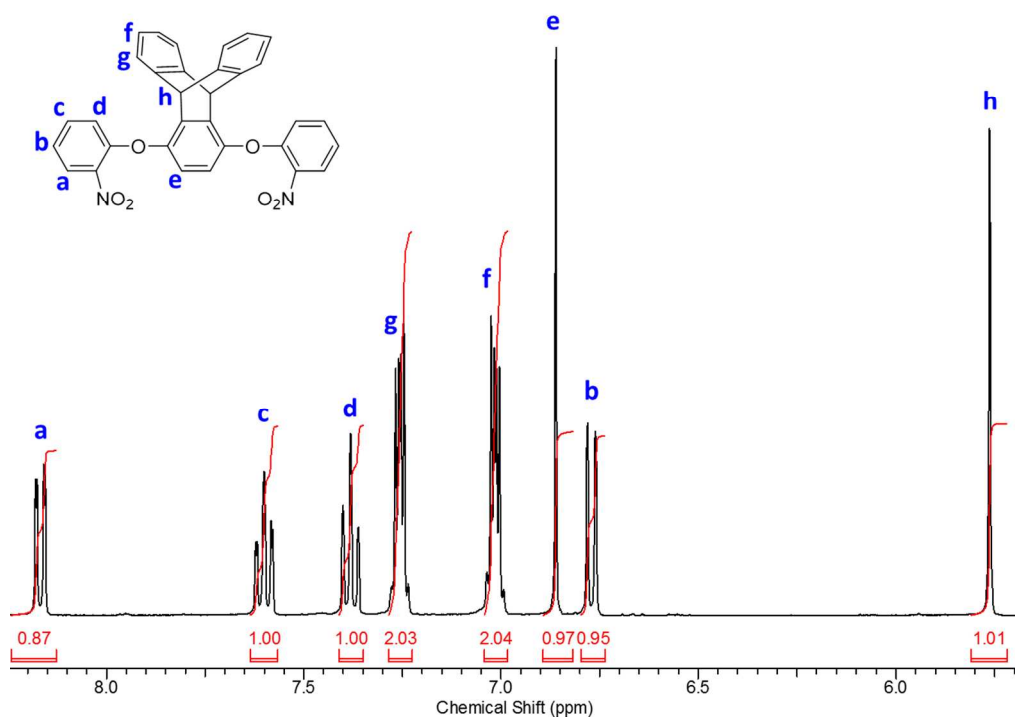

**1,4-bis(aminophenoxy)tritycene (2):** 1,4-bis(nitrophenoxy)tritycene (1) (3.33 g, 0.006 mol), 10% Pd/C catalyst (0.17 g), and alcohol (135 mL) were added to a 250 mL 2-neck round bottom flask equipped with a magnetic stir bar and brought to reflux at 78 °C. Hydrazine monohydrate (5.50 g, 0.11 mol) was then added dropwise. The reaction mixture was allowed to reflux for 8 h. The alcohol was then removed under vacuum. The product was dissolved in a minimal amount of hot DMF and the catalyst was removed via vacuum filtration through packed Celite<sup>®</sup>. The

DMF solution as then precipitated in water. The diamine monomer (**2**) was collected and dried under vacuum at 100 °C overnight (yield = 81%).

**<sup>1</sup>H NMR spectra of intermediates of 2,6-triptycene-based monomers:**

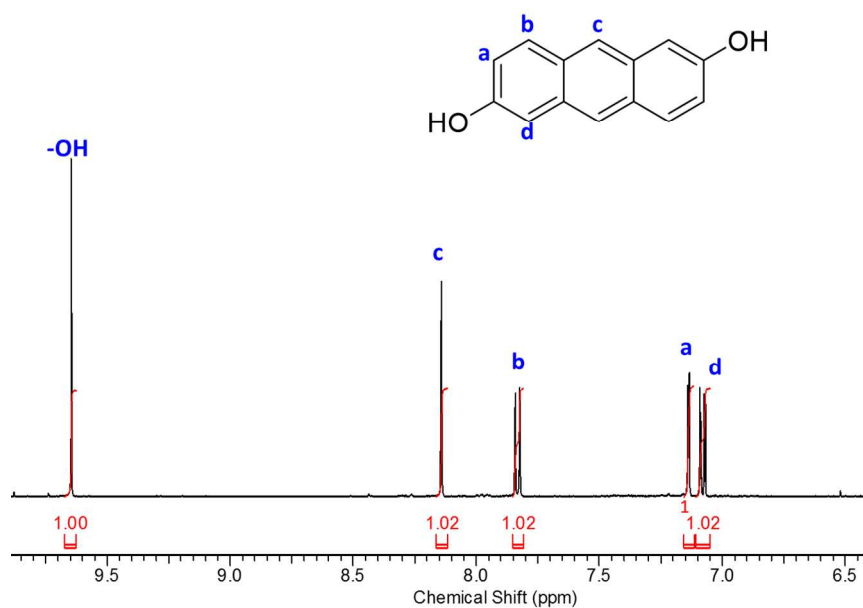

**Figure S1.** <sup>1</sup>H NMR spectrum of 2,6-dihydroxytryptene in DMSO-*d*<sub>6</sub>

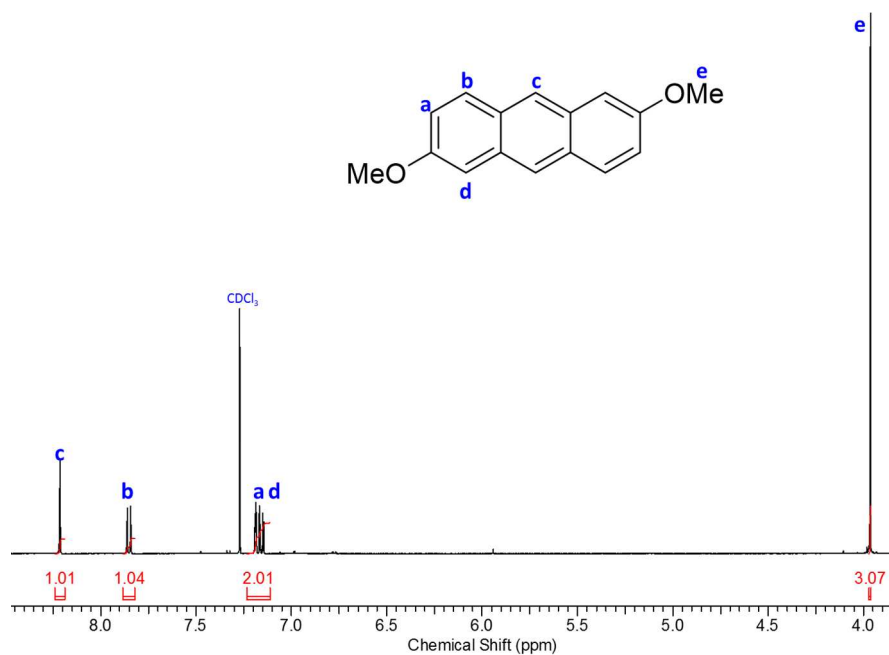

**Figure S2.** <sup>1</sup>H NMR spectrum of 2,6-dimethoxytryptene in CDCl<sub>3</sub>

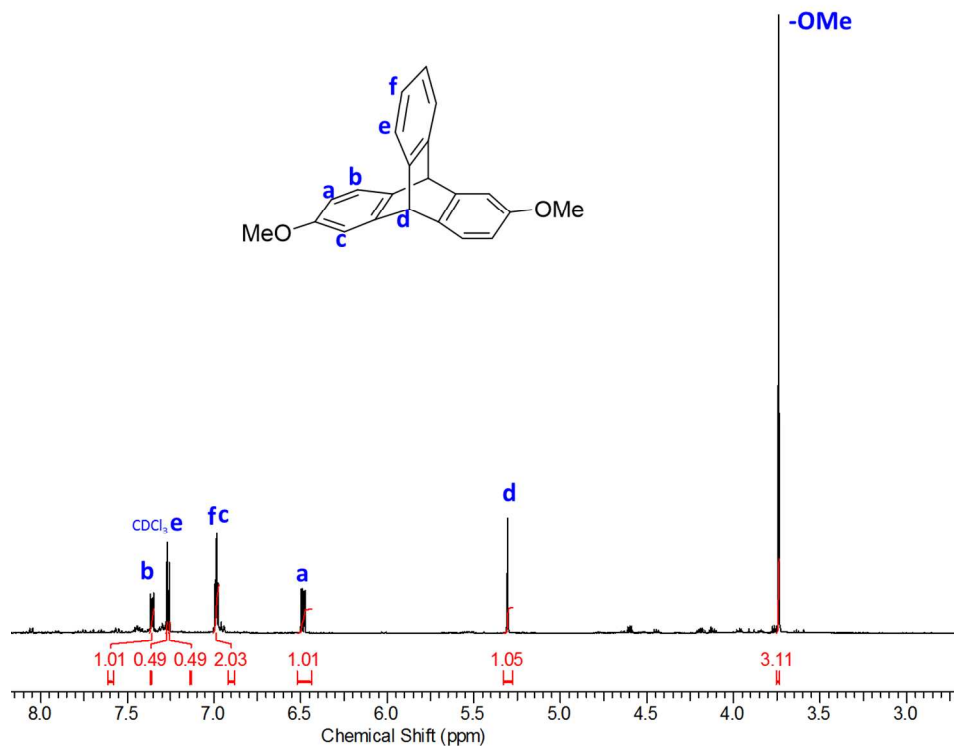

**Figure S3.**  $^1\text{H}$  NMR spectrum of 2,6-dimethoxytryptycene in  $\text{CDCl}_3$

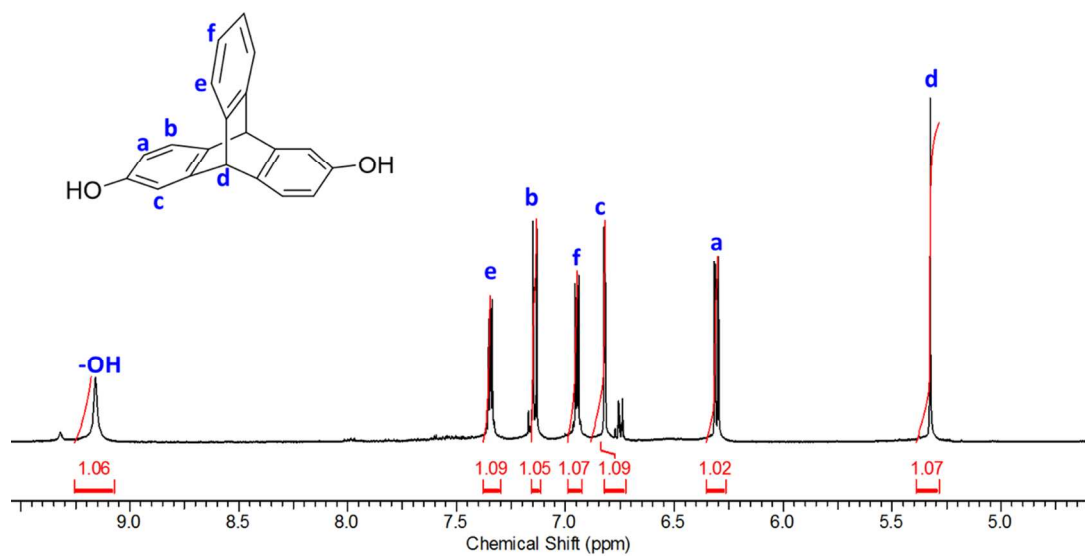

**Figure S4.**  $^1\text{H}$  NMR spectrum of 2,6-dihydroxytryptycene in  $\text{DMSO}-d_6$

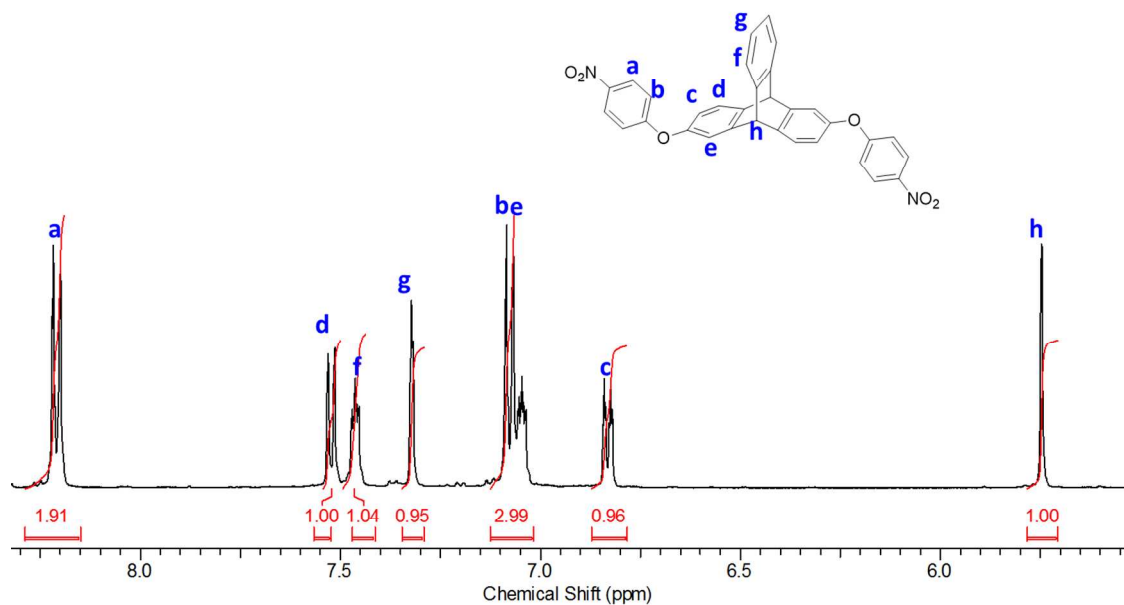

**Figure S5.** <sup>1</sup>H NMR spectrum of 2,6-bis(nitrophenoxy)tritycene in DMSO-*d*<sub>6</sub>

**Table S1: Pure gas permeabilities (Barrer) and selectivities at 3 atm and 35 °C.**

|                     | Permeability (barrer) |                | Selectivity                    |                                |
|---------------------|-----------------------|----------------|--------------------------------|--------------------------------|
|                     | H <sub>2</sub>        | O <sub>2</sub> | H <sub>2</sub> /N <sub>2</sub> | O <sub>2</sub> /N <sub>2</sub> |
| Fresh               |                       |                |                                |                                |
| 6FDA-1,4-trip_ortho | 29                    | 2              | 104                            | 7.1                            |
| 6FDA-2,6-trip_para  | 30                    | -              | 74                             | -                              |

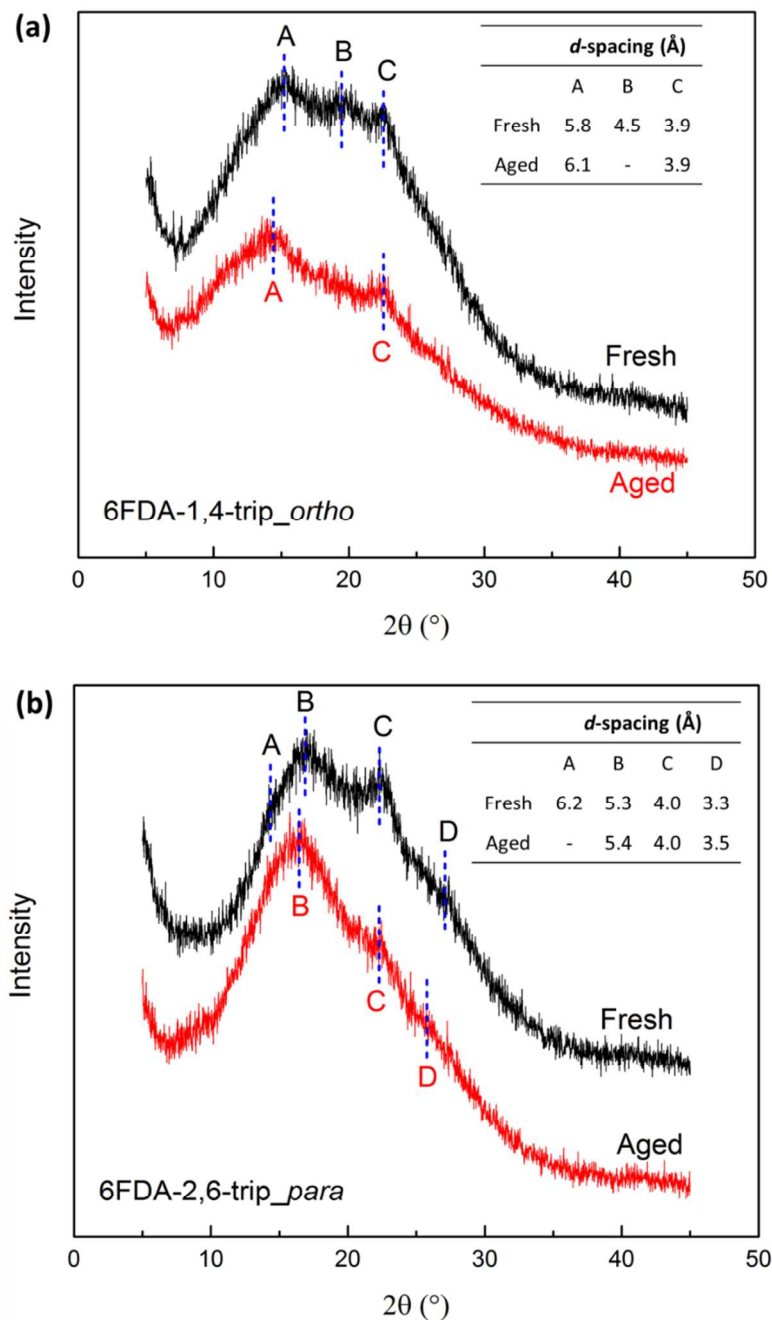

**Figure S6.** Wide-angle X-ray diffraction patterns of (a) fresh and aged (2.5 years) 6FDA-1,4-trip\_ortho films and (b) fresh and aged (5 months) 6FDA-2,6-trip\_para films.

## References

- [1] J.R. Wiegand, Z.P. Smith, Q. Liu, C.T. Patterson, B.D. Freeman, R. Guo, Synthesis and characterization of triptycene-based polyimides with tunable high fractional free volume for gas separation membranes, *J. Mater. Chem. A* 2 (2014) 13309. doi:10.1039/C4TA02303J.
